# Supplementary material for: DNA methylation patterns expose variations in enhancer-chromatin modifications during embryonic stem cell differentiation
Source: PubMed Central journal article supplement (PMC8062104; doi:10.1371/journal.pgen.1009498), 2021-04-12

Table S1

ChIP-BS-Seq data from ESCs

H3K4me1

H3K27ac

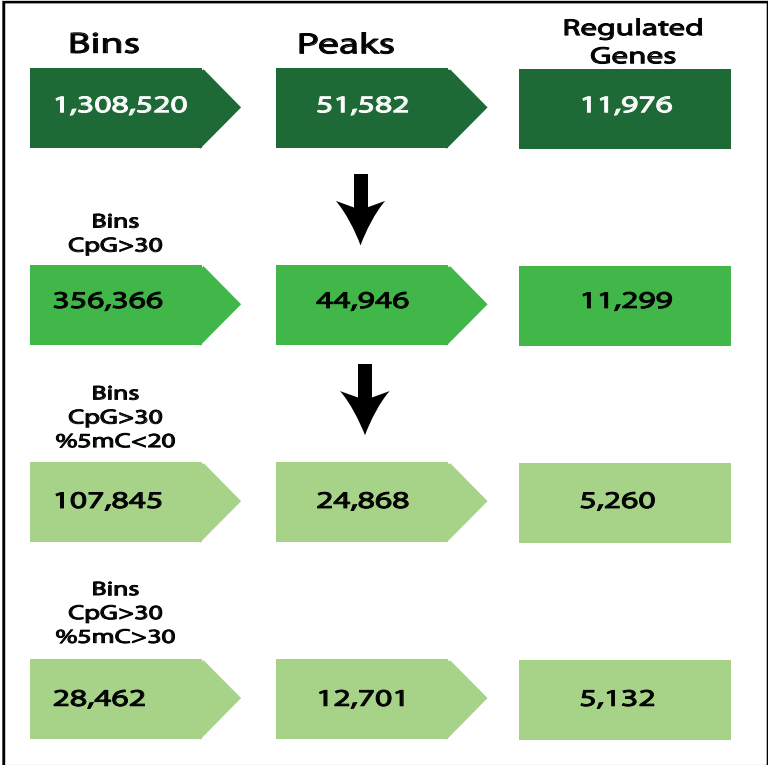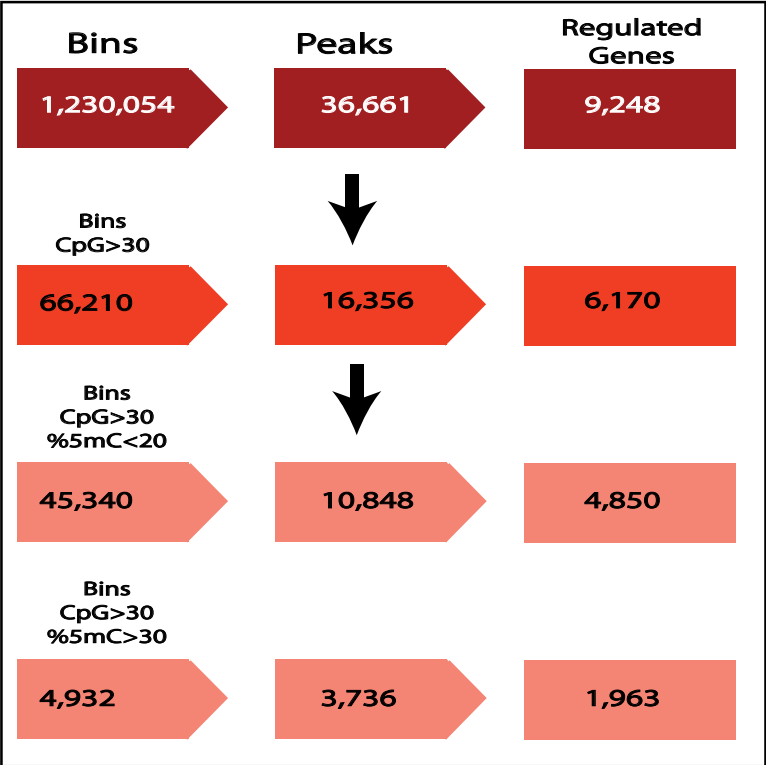

H3K4me1 and H3K27ac

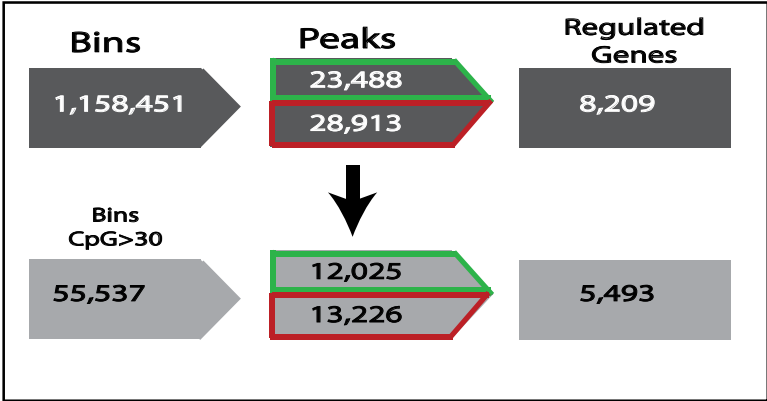

Supplement: pgen.1009498.s012.pdf [file pgen.1009498.s012.pdf]
