# Supplementary material for: DNA methylation patterns expose variations in enhancer-chromatin modifications during embryonic stem cell differentiation
Source: PubMed Central journal article supplement (PMC8062104; doi:10.1371/journal.pgen.1009498), 2021-04-12

Table S2

## ChIP-BS-Seq data from differentiated cells

### H3K4me1

### H3K27ac

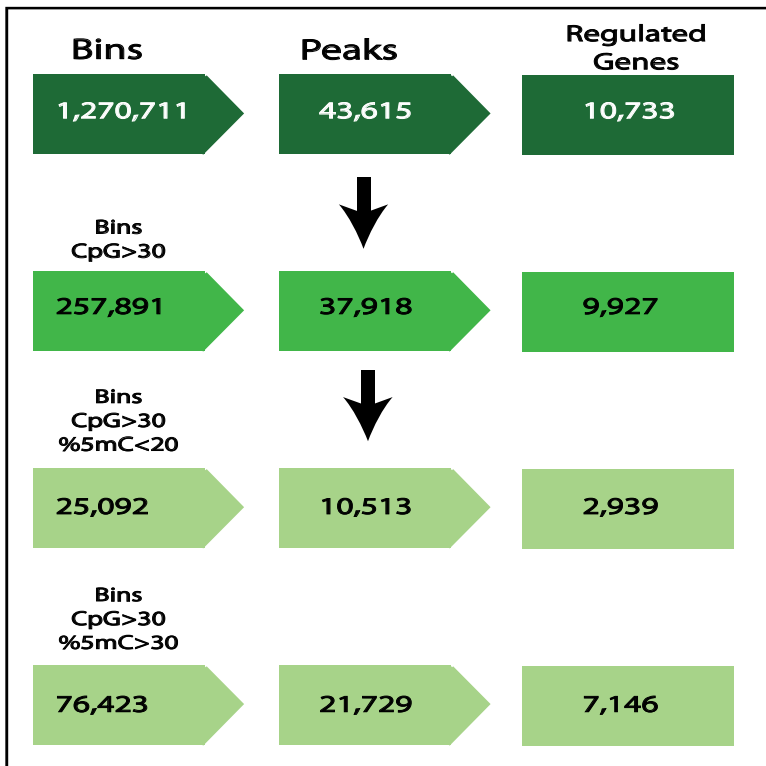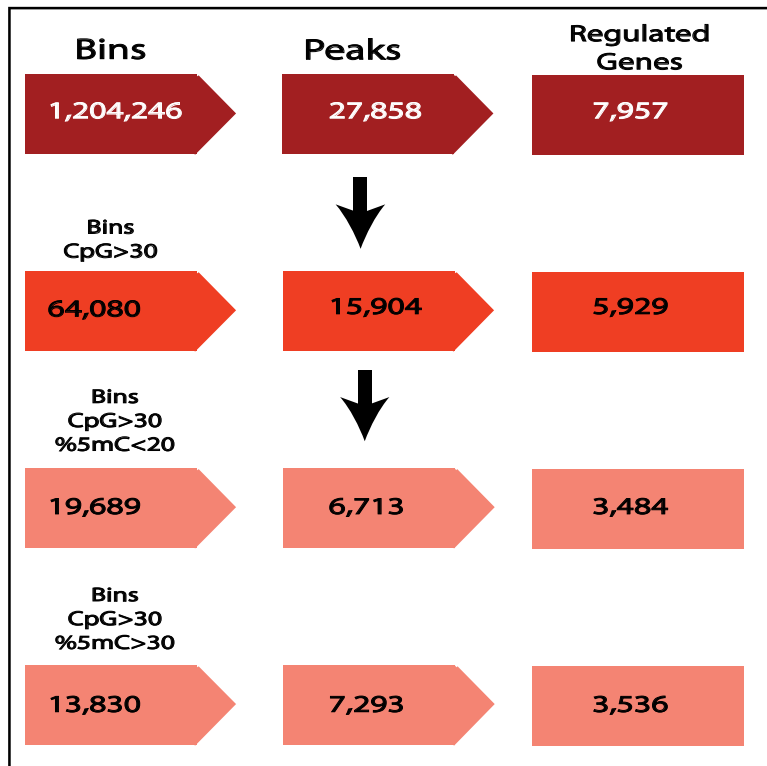

### H3K4me1 and H3K27ac

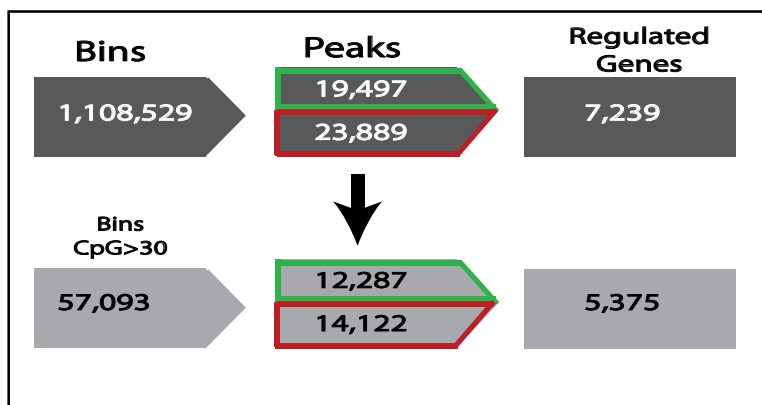

Supplement: pgen.1009498.s013.pdf [file pgen.1009498.s013.pdf]
